# Supplementary material
Source: publisher site journal article supplement (https://www.dovepress.com/article/299775)
Supplement: Supplementary file 1 [file get_supplementary_file.php]

## Supplementary material

*Table S1. Patient cohort 1: Correlations between cell surface markers (MFI) on non-classical, intermediate and classical monocyte subsets and disease activity scores.*

|  | | Non-classical | | Intermediate | | | Classical | | | |
| --- | --- | --- | --- | --- | --- | --- | --- | --- | --- | --- |
|  | CCR2 | | CD11b | | CCR2 | CD11b | | CCR2 | CD11b |
| mDF | 0.40 (0.14) | | -0.04 (0.90) | | 0.03 (0.91) | 0.06 (0.84) | | -0.04 (0.88) | 0.16 (0.56) |
| MELD | 0.01 (0.96) | | 0.03 (0.93) | | -0.11 (0.69) | -0.07 (0.81) | | -0.29 (0.29) | -0.11 (0.70) |
| GAHS | -0.15 (0.61) | | 0.09 (0.77) | | -0.04 (0.89) | 0.43 (0.13) | | -0.41 (0.14) | 0.18 (0.54) |
| CP | -0.05 (0.87) | | 0.04 (0.90) | | -0.09 (0.76) | 0.10 (0.71) | | -0.32 (0.24) | -0.13 (0.64) |
| PP | -0.51 (0.05) | | 0.14 (0.62) | | -0.08 (0.77) | -0.17 (0.55) | | -0.01 (0.97) | -0.15 (0.59) |
| CRP | -0.30 (0.30) | | 0.29 (0.32) | | 0.05 (0.88) | 0.10 (0.74) | | -0.25 (0.39) | -0.31 (0.28) |

*Data assessed by spearman correlation and presented as r (p). (mDF: Maddrey’s discriminant function, MELD: Model for End-Stage Liver Disease, GAHS: Glasgow Alcoholic Hepatitis Score, CP: Child-Pugh Score and PP: performance points).*

*Table S2. Cohort 2: Correlations between monocyte surface markers (RPKM) and disease scores in all monocytes from liver tissue.*

|  | CD11b | CX3CR1 | CCR2 | CD14 | CD16a | CD16b |
| --- | --- | --- | --- | --- | --- | --- |
| MELD | 0.05 (0.87) | -0.27 (0.39) | -0.37 (0.23) | -0.30 (0.35) | -0.03 (0.93) | 0.27 (0.39) |
| GAHS | 0.21 (0.51) | -0.14 (0.66) | -0.38 (0.22) | -0.49 (0.11) | 0.09 (0.78) | 0.43 (0.16) |
| CP | 0.30 (0.33) | 0.04 (0.90) | 0.03 (0.94) | -0.52 (0.09) | 0.23 (0.47) | 0.62 (0.03)* |
| CRP | 0.07 (0.83) | 0.03 (0.92) | -0.14 (0.66) | -0.19 (0.56) | -0.07 (0.83) | 0.01 (0.99) |

*Data assessed by spearman correlation and presented as r (p). Asterix (*) marks a significant correlation and p value < 0.05. (MELD: Model for End-Stage Liver Disease, GAHS: Glasgow Alcoholic Hepatitis Score and CP: Child-Pugh Score). RPKM; Reads Per Kilobase Million.*

*Figure S1. Gating strategy. Monocytes were first gated on forward scatter (FSC-A) versus side scatter (SSC-A). Then, single cells were gated based on forward scatter area (FSC-A) versus forward scatter height (FSC-H). Anti-CD56 and LiveDead staining were combined in a dump channel to exclude dead cells and natural killer (NK) cells. Finally, monocytes were divided into three subsets based on their expression of CD14 and CD16; classical (CD14highCD16neg), non-classical (CD14lowCD16pos) and intermediate (CD14highCD16pos).*
